# Supplementary material
Source: PubMed Central journal article supplement (PMC4291480)

# Source data for Fig. 2H

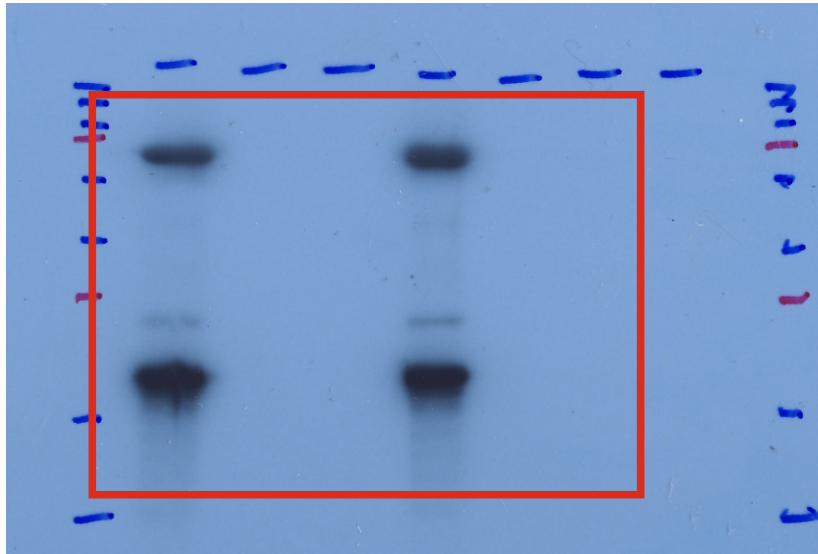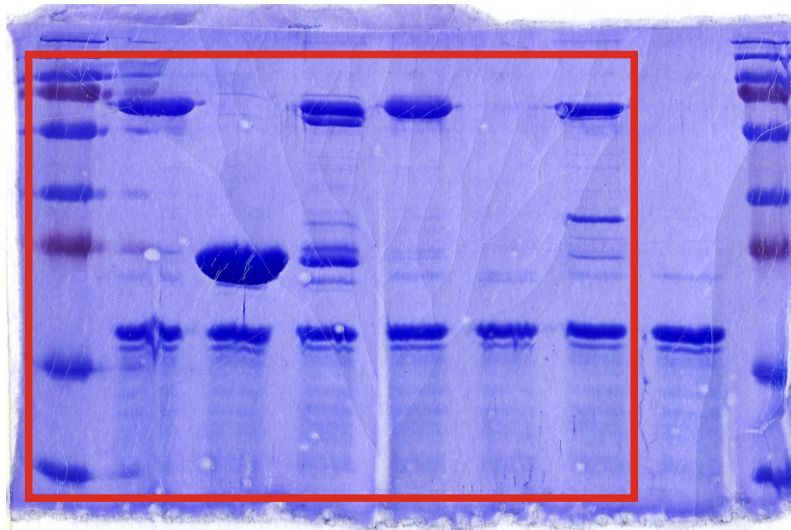

Supplement: embj0034-0055-sd5.pdf [file embj0034-0055-sd5.pdf]

# Source data for Fig. 3F

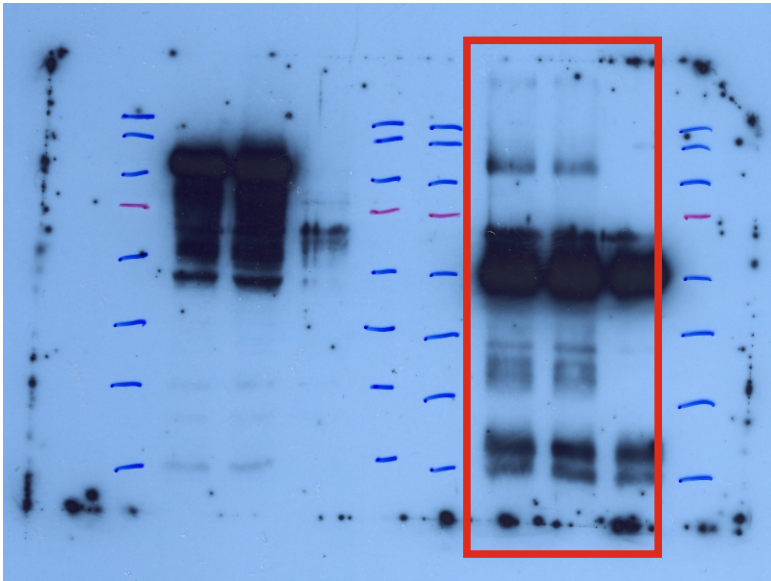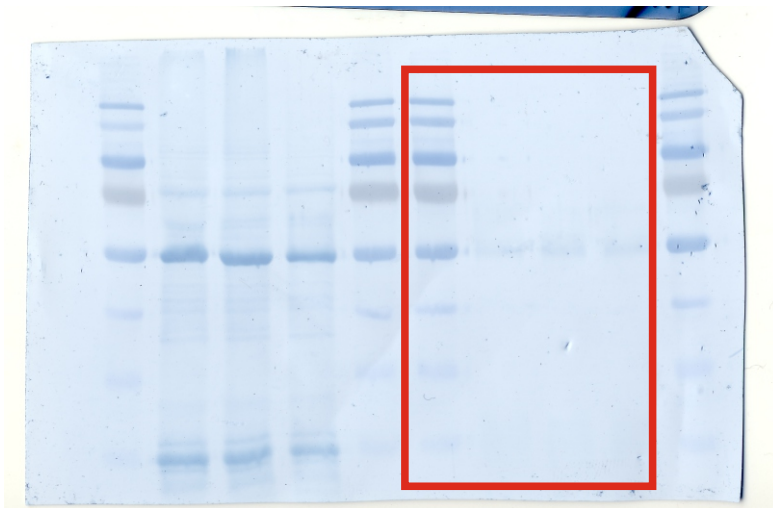

Supplement: embj0034-0055-sd7.pdf [file embj0034-0055-sd7.pdf]

# Source data for Fig. 4A

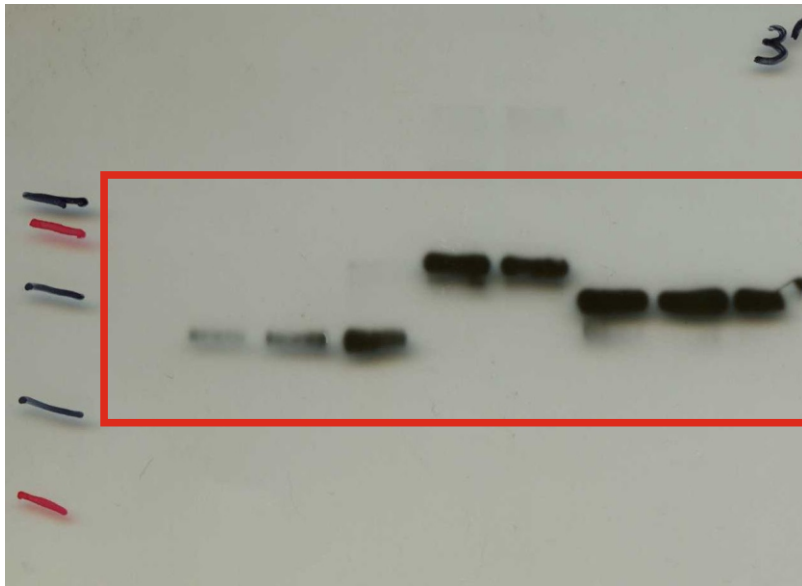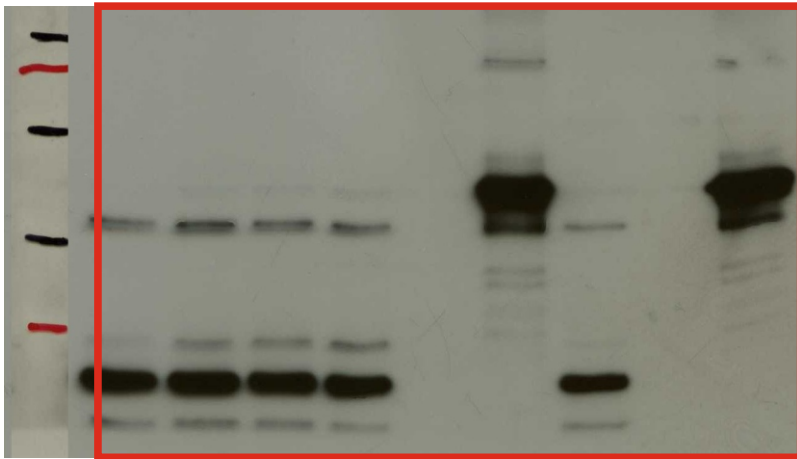

Supplement: embj0034-0055-sd8.pdf [file embj0034-0055-sd8.pdf]
